# Supplementary material
Source: publisher figshare collection journal article supplement (https://karger.figshare.com/ndownloader/files/24574664)
Supplement: Supplementary file 1 [file 24574664]

| **Diagnosis *** | **Number of patients** |
| --- | --- |
| Keratoconjunctivitis sicca | 1 |
| Meibomian gland dysfunction | 7 |
| Primary Sjögren syndrome | 11 |
| Secondary Sjögren syndrome | 9 |
| Keratoconus | 2 |
| Atopic Keratitis | 4 |
| Mucous membrane pemphigoid | 2 |
| Contusio/ Neuralgia | 1 |
| Neurotrophic Keratitis | 1 |
| Keratitis filiformis | 1 |
| Hashimoto´s thyroiditis | 1 |
| LASIK | 1 |
| Chemotherapy | 1 |
|  |  |
| * multiple diagnoses possible |  |

**Suppl. Table 1**: Underlying diagnoses and concomitant morbidities in n=41 DED patients. Multiple pathologies were possible.
